# Supplementary material for: Synergistic enhancement of Cu2Se thermoelectric properties via Te and S co-doping: aqueous synthesis and cold-press sintering for power generation
Source: Royal Society of Chemistry journal article supplement (doi:10.1039/d4ta09047k), 2025-01-01
Supplement: d4ta09047k1.pdf [file d4ta09047k1.pdf]

## Supporting Information

### **Synergistic Enhancement of Cu<sub>2</sub>Se Thermoelectric Properties via *Te* and *S* Co-doping: Aqueous Synthesis and Cold-Press Sintering for Power Generation**

Vinothkumar Lourdhusamy<sup>1</sup>, Immanuel Paulraj<sup>1</sup>, Veera Prabu Kannan<sup>2</sup>, and Chia-Jyi Liu<sup>1,\*</sup>

<sup>1</sup>Department of Physics, National Changhua University of Education, Changhua 500, Taiwan

<sup>2</sup>Department of Metallurgical and Materials Engineering, IIT Madras, Chennai 600036,  
Tamil Nadu, India

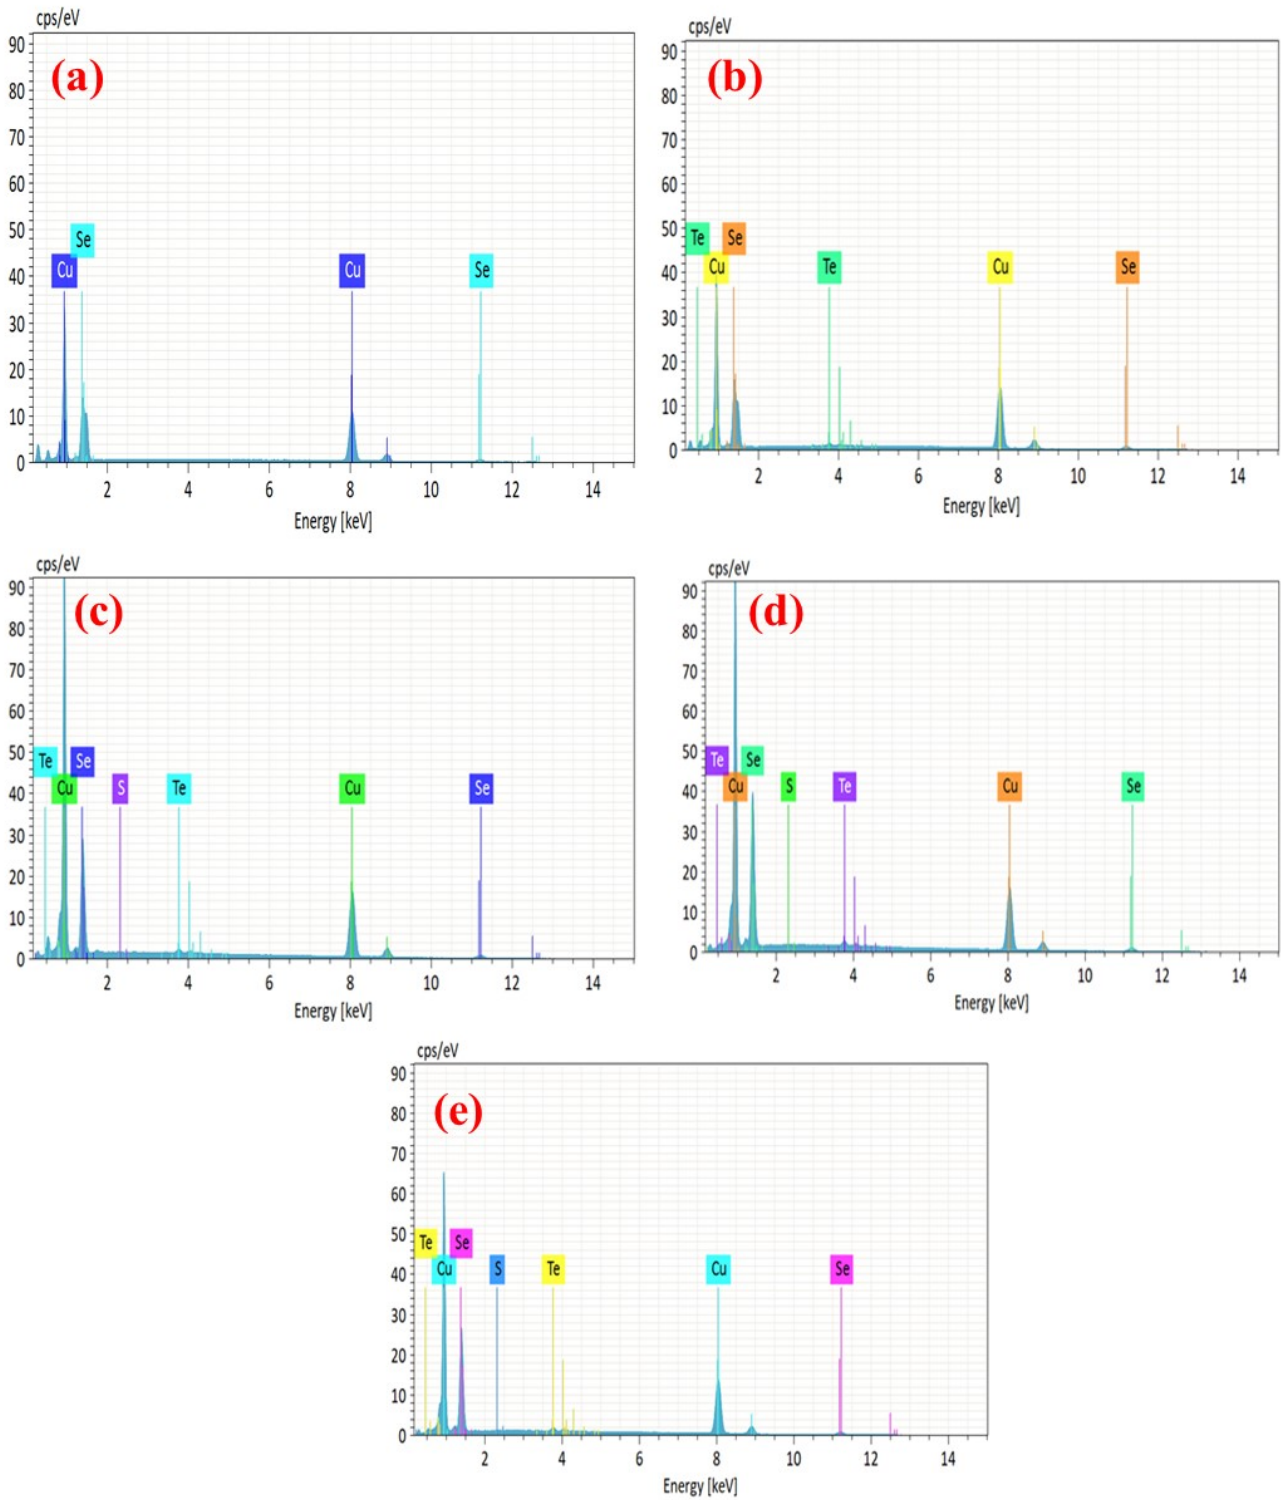

**Fig. S1** EDAX of (a)  $\text{Cu}_2\text{Se}$ , (b)  $\text{Cu}_2\text{Se}_{0.96}\text{Te}_{0.04}$ , (c)  $\text{Cu}_2\text{Se}_{0.95}\text{S}_{0.01}\text{Te}_{0.04}$ , (d)  $\text{Cu}_2\text{Se}_{0.94}\text{S}_{0.02}\text{Te}_{0.04}$ , (e)  $\text{Cu}_2\text{Se}_{0.93}\text{S}_{0.03}\text{Te}_{0.04}$ .

The weighted mobility of the  $\text{Cu}_2\text{Se}$  and  $\text{Cu}_2\text{Se}_{0.96-x}\text{S}_x\text{Te}_{0.04}$  (where  $x = 0.00, 0.01, 0.02,$  and  $0.03$ ) was determined using

$$\mu_w = \frac{3 h^3}{8 \pi e \rho (2 m_e k_B T)^{3/2}} \left[ \frac{\text{Exp} \left[ \frac{|S|}{k_B} - 2 \right]}{1 + \text{Exp} \left[ -5 \left( \frac{|S|}{k_B} - 1 \right) \right]} + \frac{\frac{3 |S|}{\pi^2 k_B}}{e} \right] \frac{1}{1 + \text{Exp} \left[ 5 \left( \frac{|S|}{k_B} - 1 \right) \right]}, \quad (\text{S1})$$

where  $h$ ,  $e$ ,  $\rho$ ,  $k_B$ ,  $m_e$ ,  $S$ , and  $T$  are Plank's Constant, the carrier's charge, electrical resistivity in  $\text{m}\Omega\text{-cm}$ , the Boltzmann constant, the electron's rest mass, Seebeck coefficient, and absolute temperature, respectively.

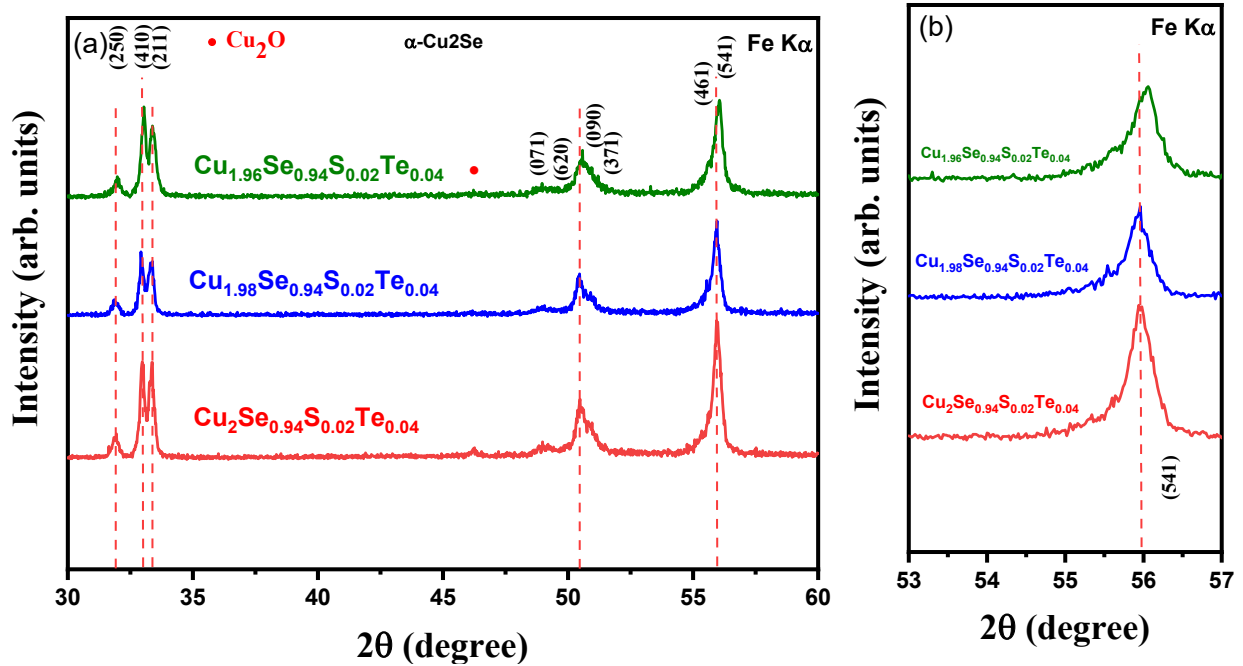

Fig. S2 XRD patterns of  $\text{Cu}_{2-y}\text{Se}_{0.94}\text{S}_{0.02}\text{Te}_{0.04}$  ( $y = 0.00, 0.02,$  and  $0.04$ ) (a) sintered at  $923\text{ K}$  for  $6\text{ h}$  in vacuum; (b) with an expanded view for greater detail.

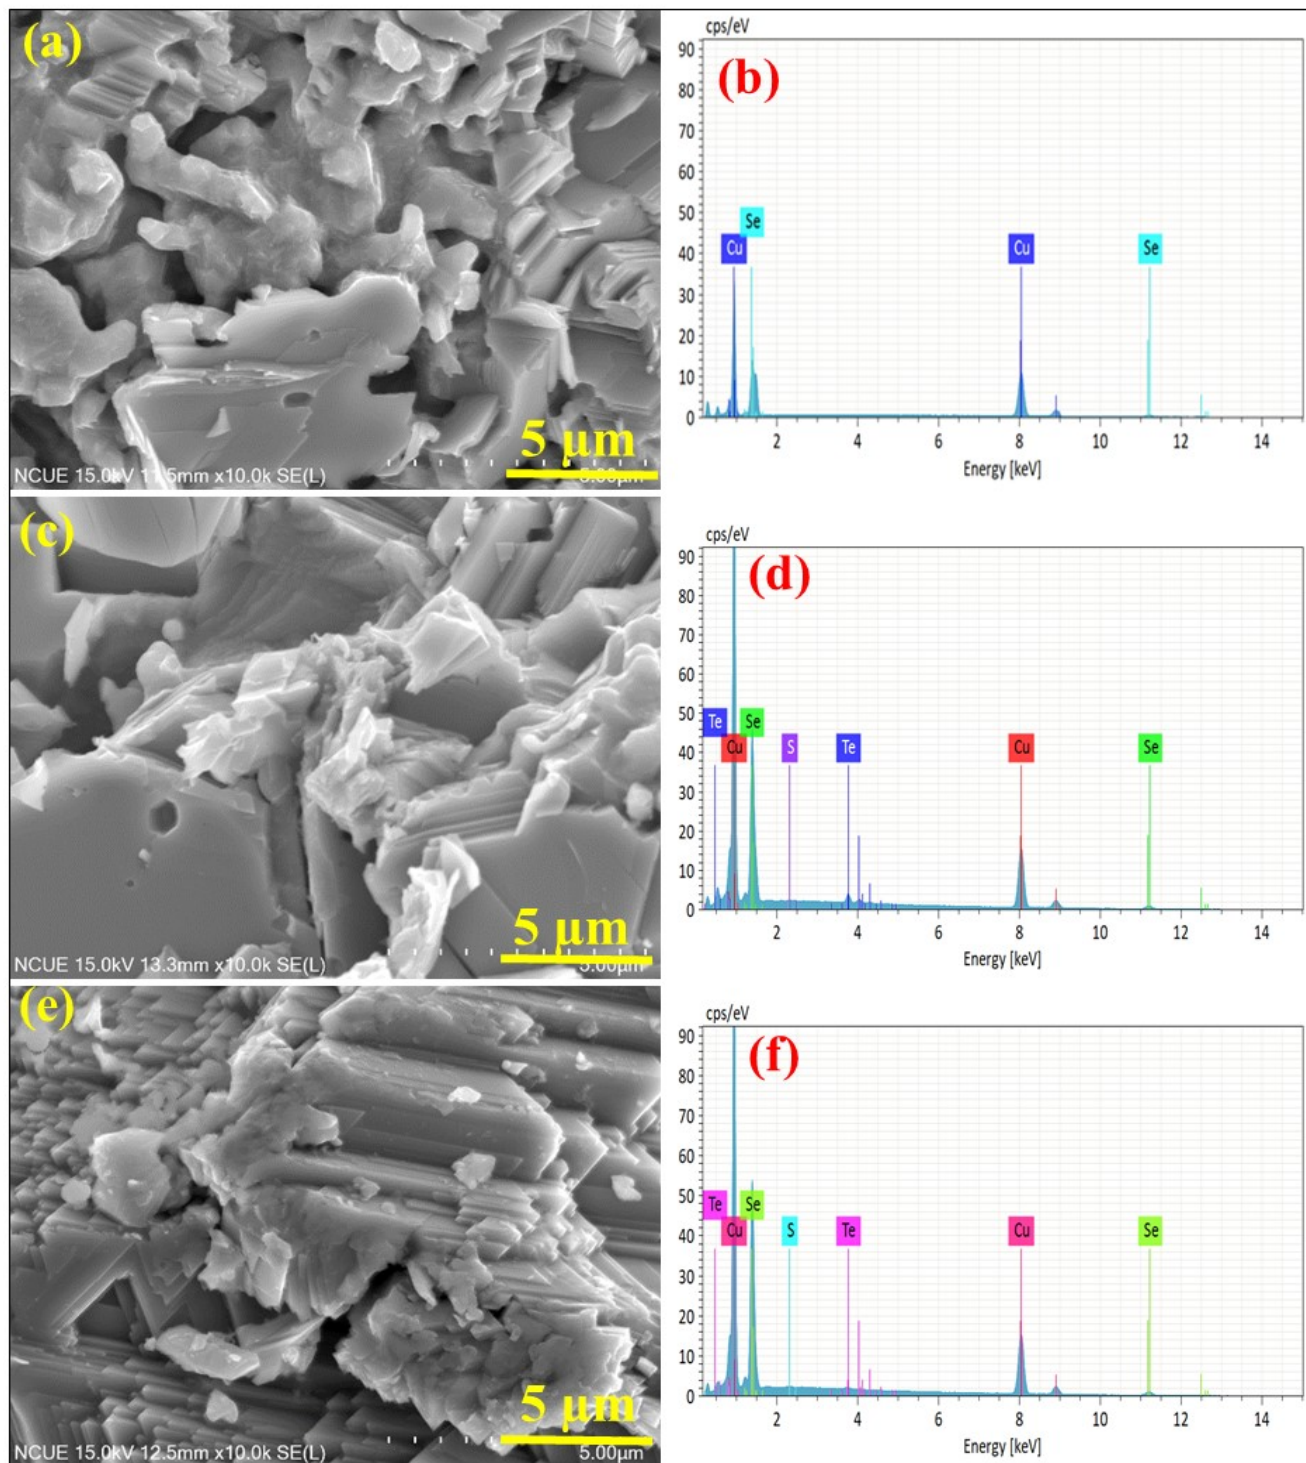

**Fig. S3** FE-SEM and EDAX analysis of (a-b)  $\text{Cu}_2\text{Se}_{0.94}\text{S}_{0.02}\text{Te}_{0.04}$ ; (c-d),  $\text{Cu}_{1.98}\text{Se}_{0.94}\text{S}_{0.02}\text{Te}_{0.04}$ ; (e-h)  $\text{Cu}_{1.96}\text{Se}_{0.94}\text{S}_{0.02}\text{Te}_{0.04}$  of sintered at 923 K for 6 h in vacuum.

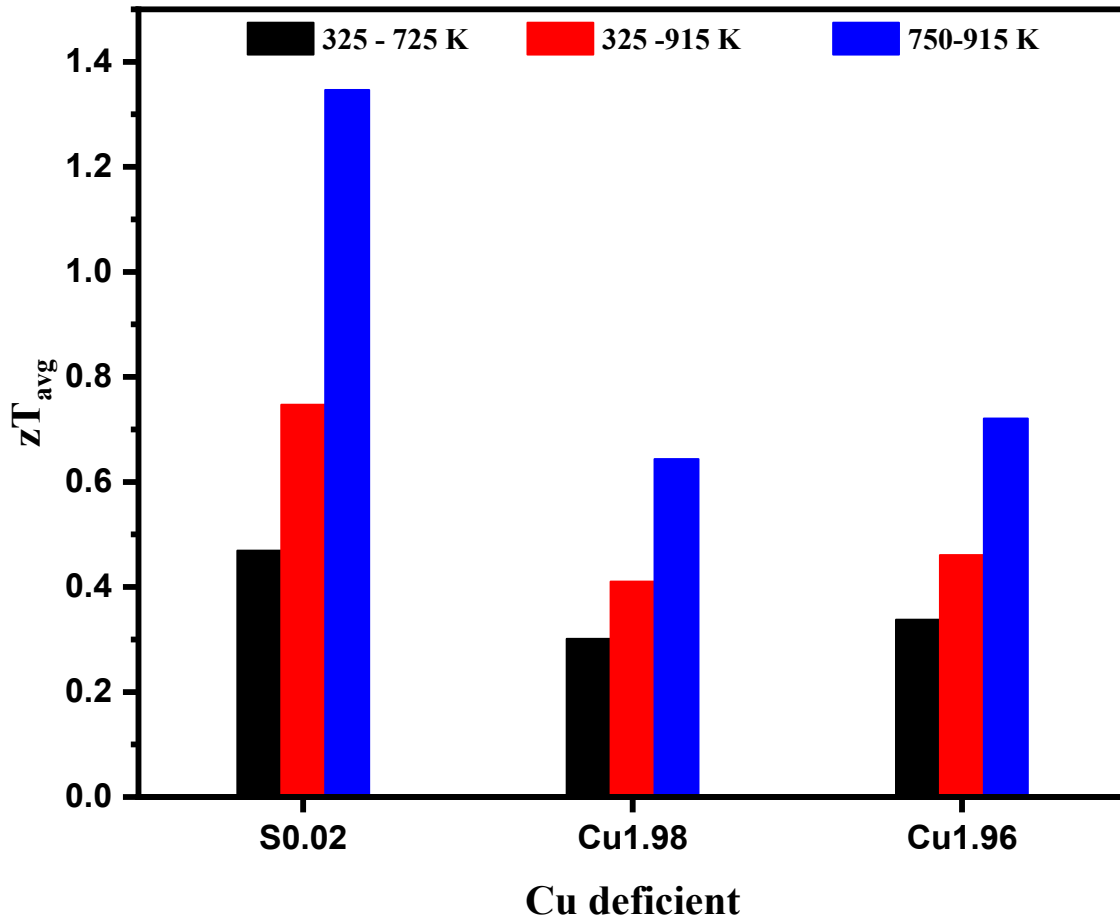

**Fig. S4** Average  $zT$  ( $zT_{avg}$ ) for  $\text{Cu}_{2-y}\text{Se}_{0.94}\text{S}_{0.02}\text{Te}_{0.04}$  with  $y = 0.00, 0.02, \text{ and } 0.04$  sintered at 923 K for 6 h in vacuum.

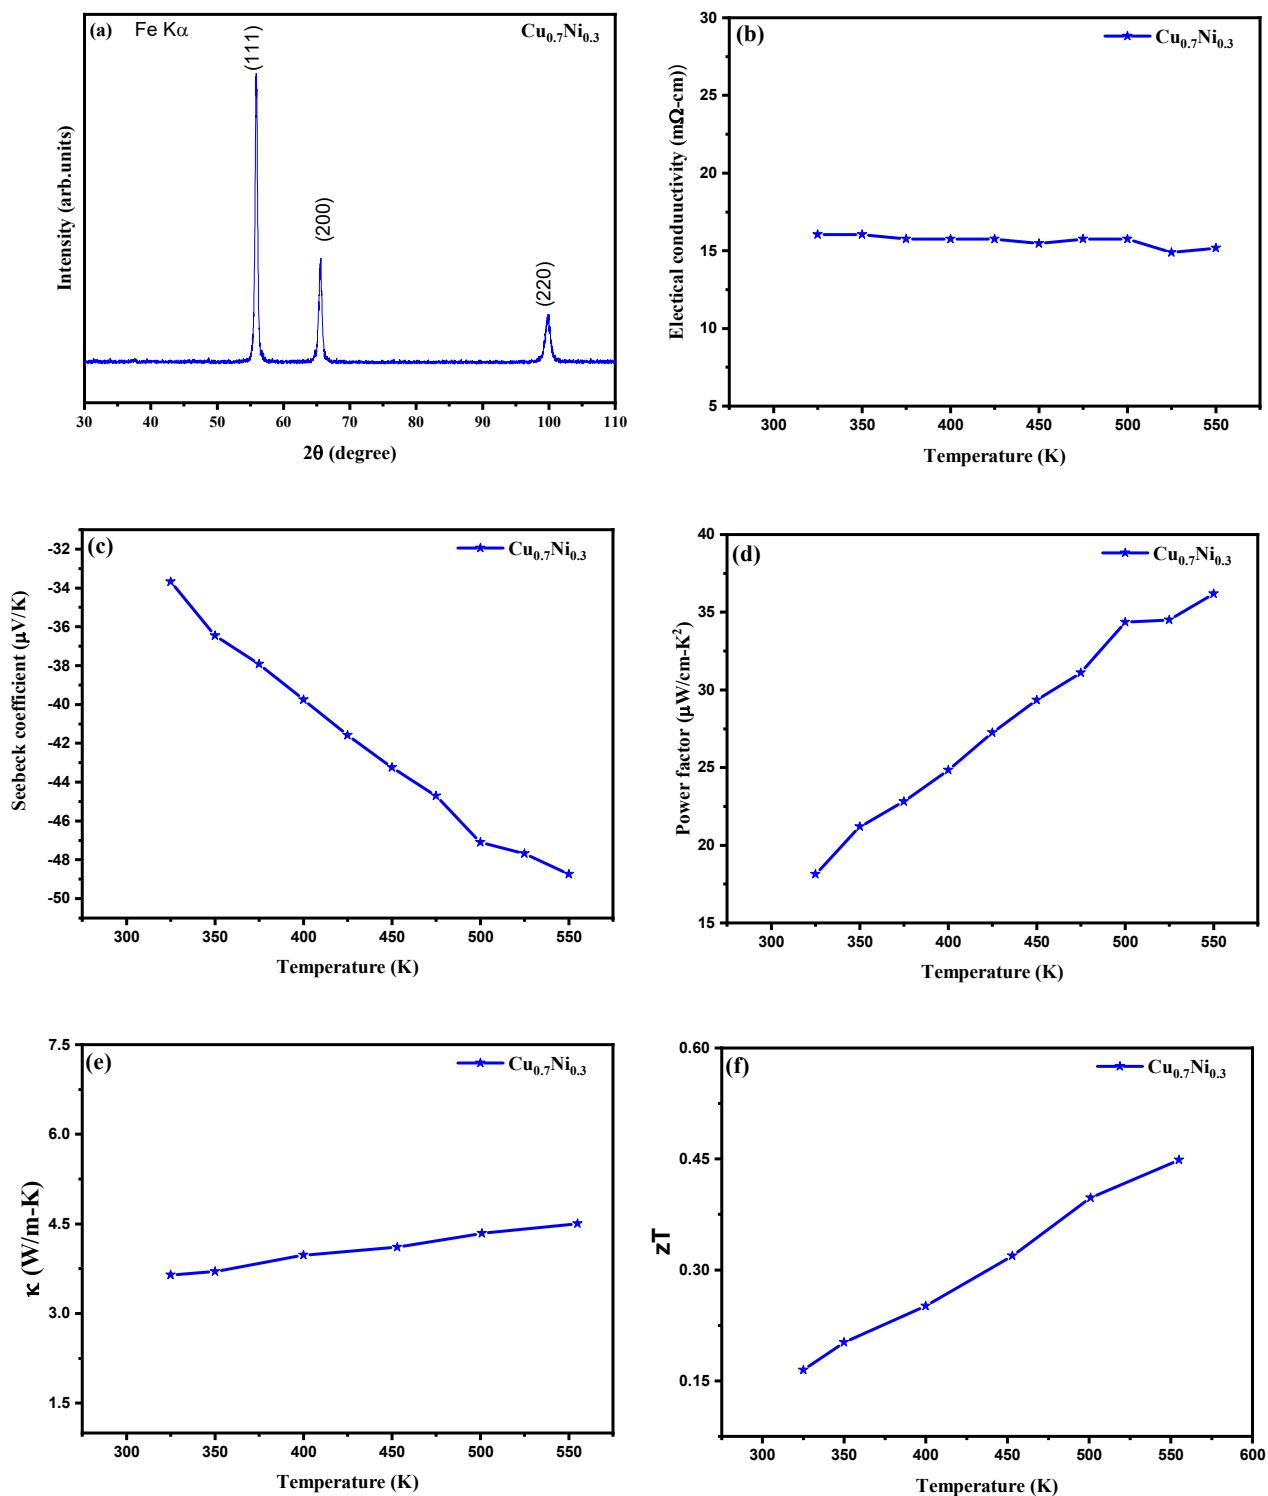

**Fig. S5** The  $\text{Cu}_{0.7}\text{Ni}_{0.3}$ . (a) X-ray diffraction pattern (b) electrical conductivity; (c) Seebeck coefficient; (d) power factor; (e) total thermal conductivity; (f)  $zT$ .
